# Supplementary material for: Mechanistic Insight into the Enzymatic Inhibition of β-Amyrin against Mycobacterial Rv1636: In Silico and In Vitro Approaches
Source: MDPI journal article supplement (doi:10.3390/biology11081214), 2022-08-12
Supplement: s1 [file s1]

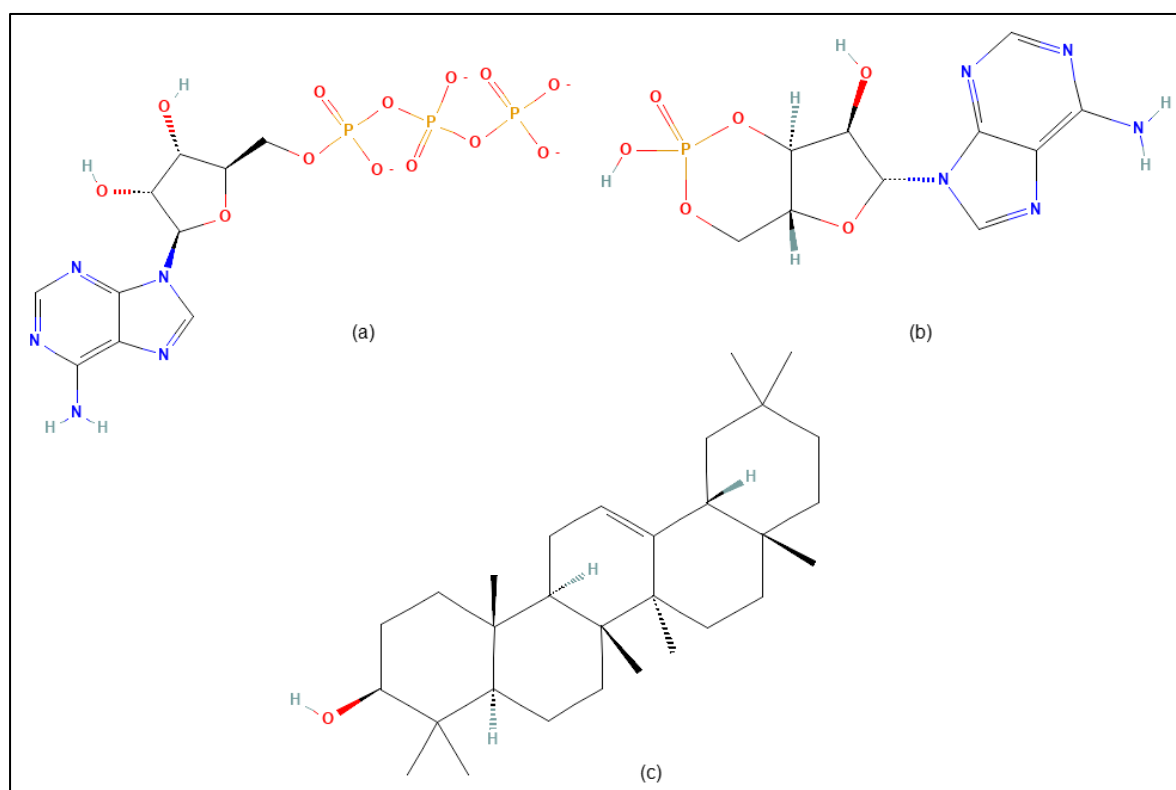

**Figure S1:** Structure of selected compounds for molecular docking. (a) 2D structure of Adenosine triphosphate (ATP). (b) 2D structure of cyclic Adenosine monophosphate (cAMP). (c) 2D structure of  $\beta$ -amyrin.
